# Supplementary material for: Geomechanical in situ testing of fault reactivation in argillite repositories
Source: Copernicus journal article supplement (doi:10.5194/sand-2-61-2023), 2023-09-06

Supplement of Saf. Nucl. Waste Disposal, 2, 61–62, 2023  
<https://doi.org/10.5194/sand-2-61-2023-supplement>  
© Author(s) 2023. CC BY 4.0 License.

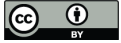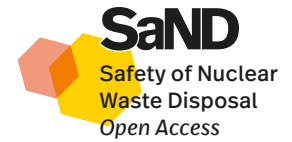

*Supplement of*

## **Geomechanical in situ testing of fault reactivation in argillite repositories**

**Jens T. Birkholzer et al.**

*Correspondence to:* Jens T. Birkholzer ([jt\\_birkholzer@lbl.gov](mailto:jt_birkholzer@lbl.gov))

The copyright of individual parts of the supplement might differ from the article licence.

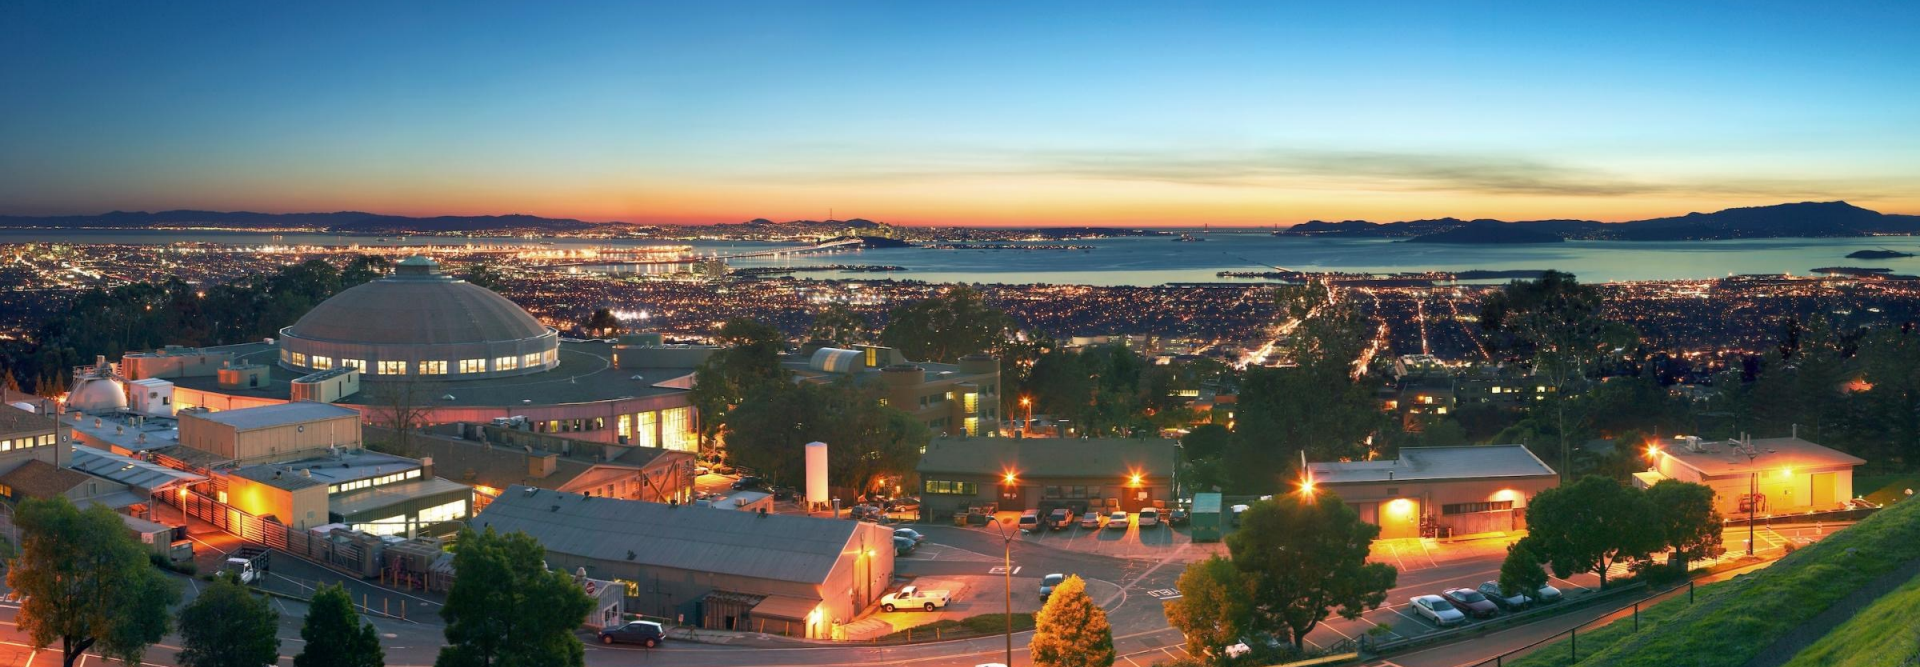

# Geomechanical *In Situ* Testing of Fault Reactivation in Argillite Repositories

Jens Birkholzer<sup>1</sup>, Yves Guglielmi<sup>1</sup>, Christophe Nussbaum<sup>2</sup>,

<sup>1</sup> Energy Geosciences Division, Berkeley Lab, USA

<sup>2</sup> Mont Terri Project, swisstopo, Switzerland

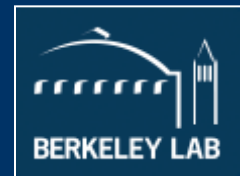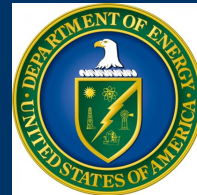

# Repository Induced Effects and Potential Impacts on Nearby Faults

- Waste emplacement causes temperature and pore pressure increase in host rock
- Gas generation causes pressure buildup and gas transport

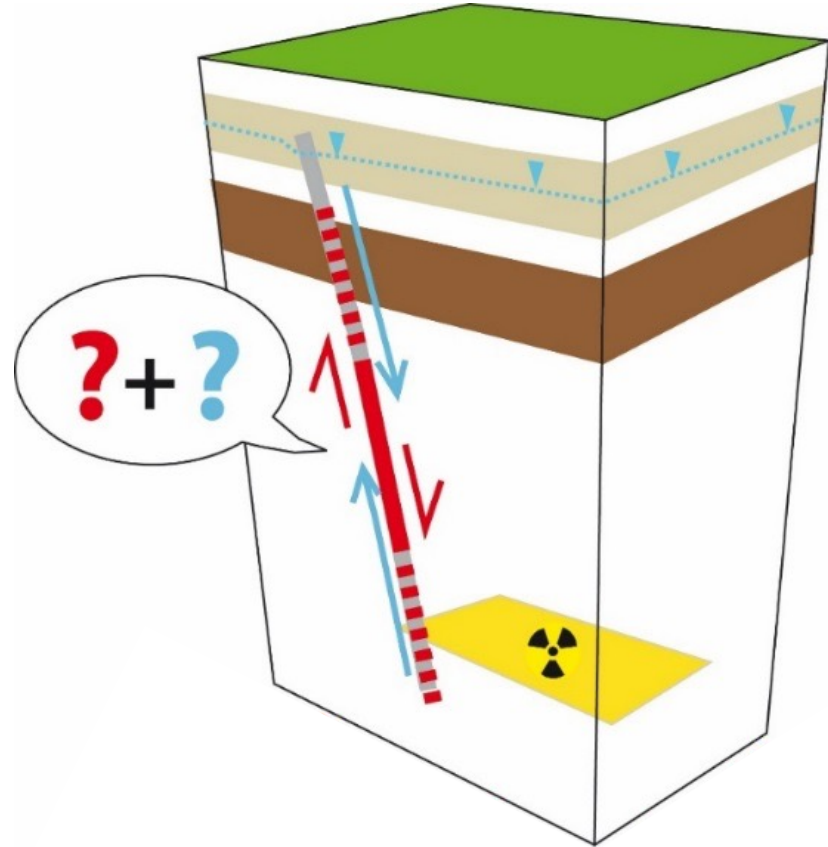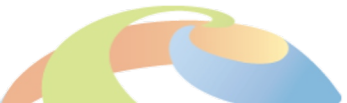

# Fault Reactivation Due to Stress Changes and Pore Pressure Buildup

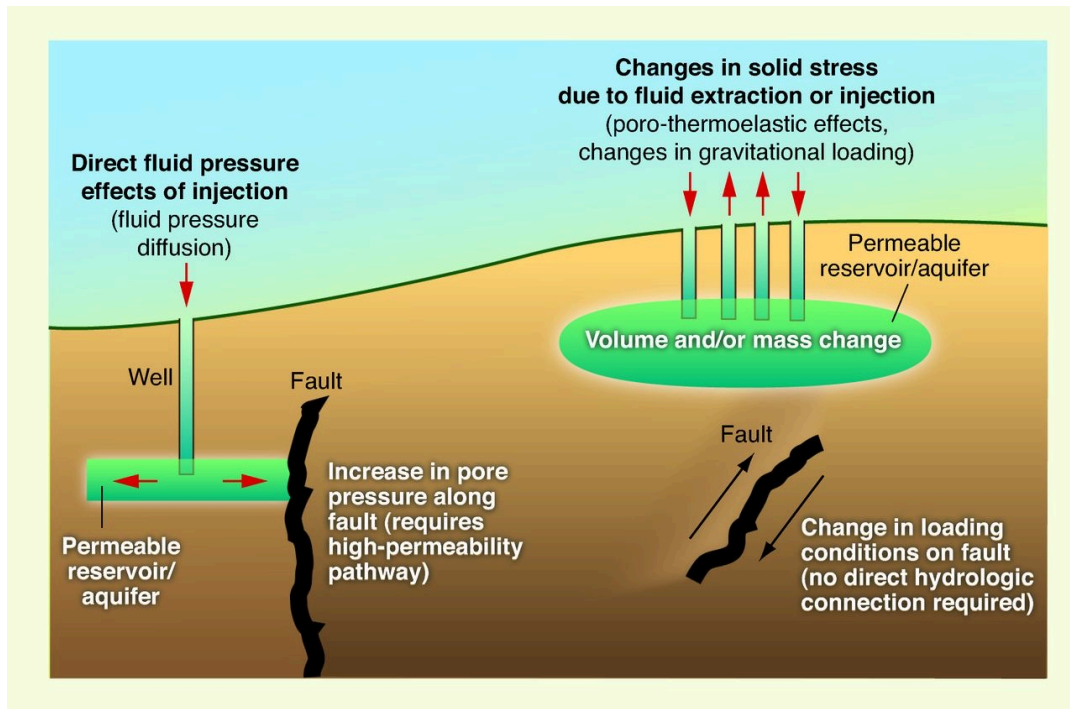

Ellsworth, 2013

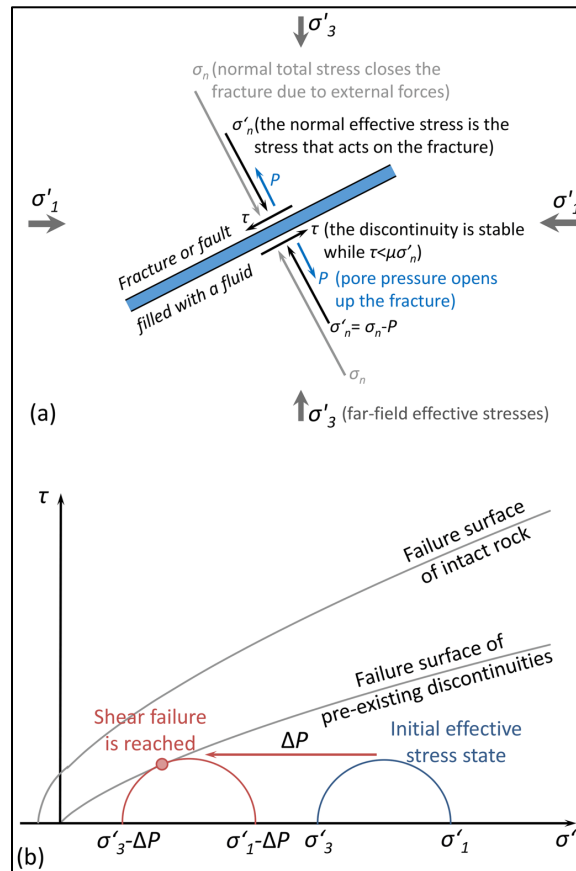

# Fault Reactivation in Argillite Host Rocks

## Research Questions about Natural Barrier Integrity:

- What is the relationship between pressure buildup, fault opening, fault slip, and fluid migration in initially low-permeability faults?
- Under what conditions are permeable pathways generated and what are the underlying mechanisms?
- Are events leading to increased fault permeability associated with observable or even strong seismicity?
- What is the long-term hydrologic behavior of reactivated faults? Can sealing or healing be expected?
- What are the potential performance implications?

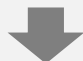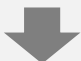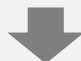

Mesoscale *In Situ* in Densely Monitored Fault Experiments

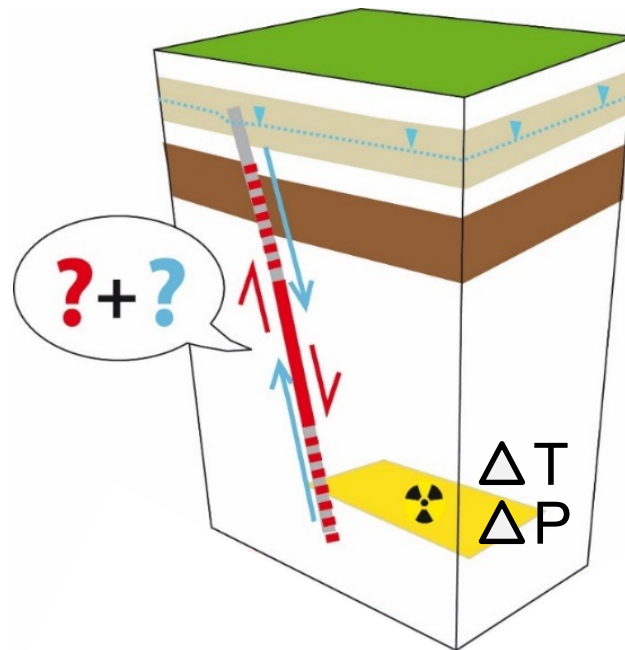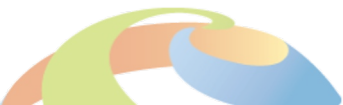

# The Mont Terri Rock Lab Has a Perfect Fault for *In Situ* Seal Testing

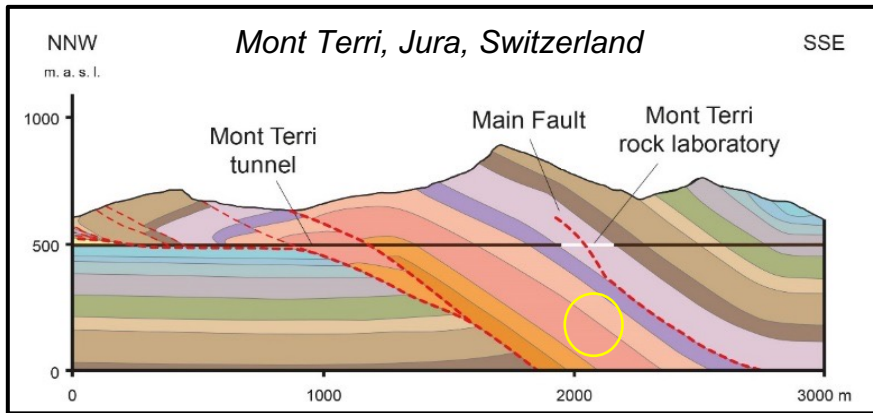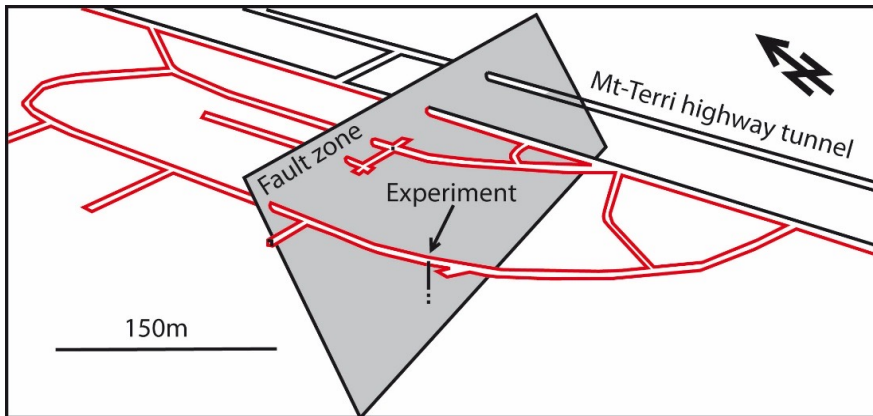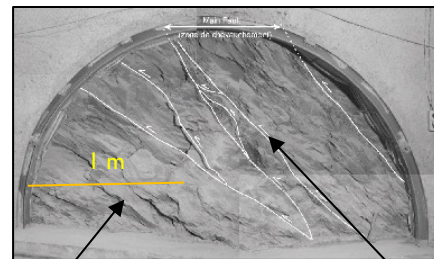

Fault Damage Zone

Fault Core

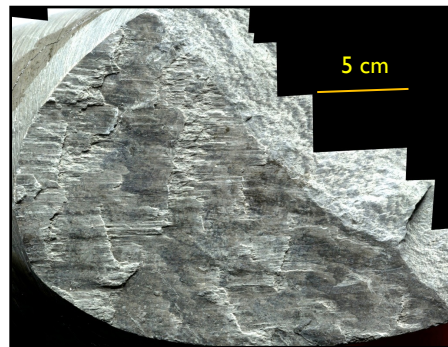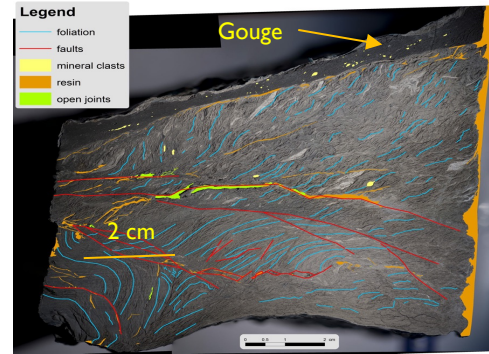

From Laurich et al., Structural Geology, 2014; Solid Earth, 2018

# A Testbed for Controlled Fault Injection Experiments: Elucidating the Coupling Between Pressure, Flow and Deformation

## 2015 Kick-Off Experiment:

Fundamental hydromechanical behavior of activated faults in a seal analog

## 2020, 2021, and 2023 Experiments:

Follow-up injection experiments with larger patch size, longer injection and post-injection cycles, and additional monitoring

## Passive Observations:

Long-term post-activation evolution of fault permeability

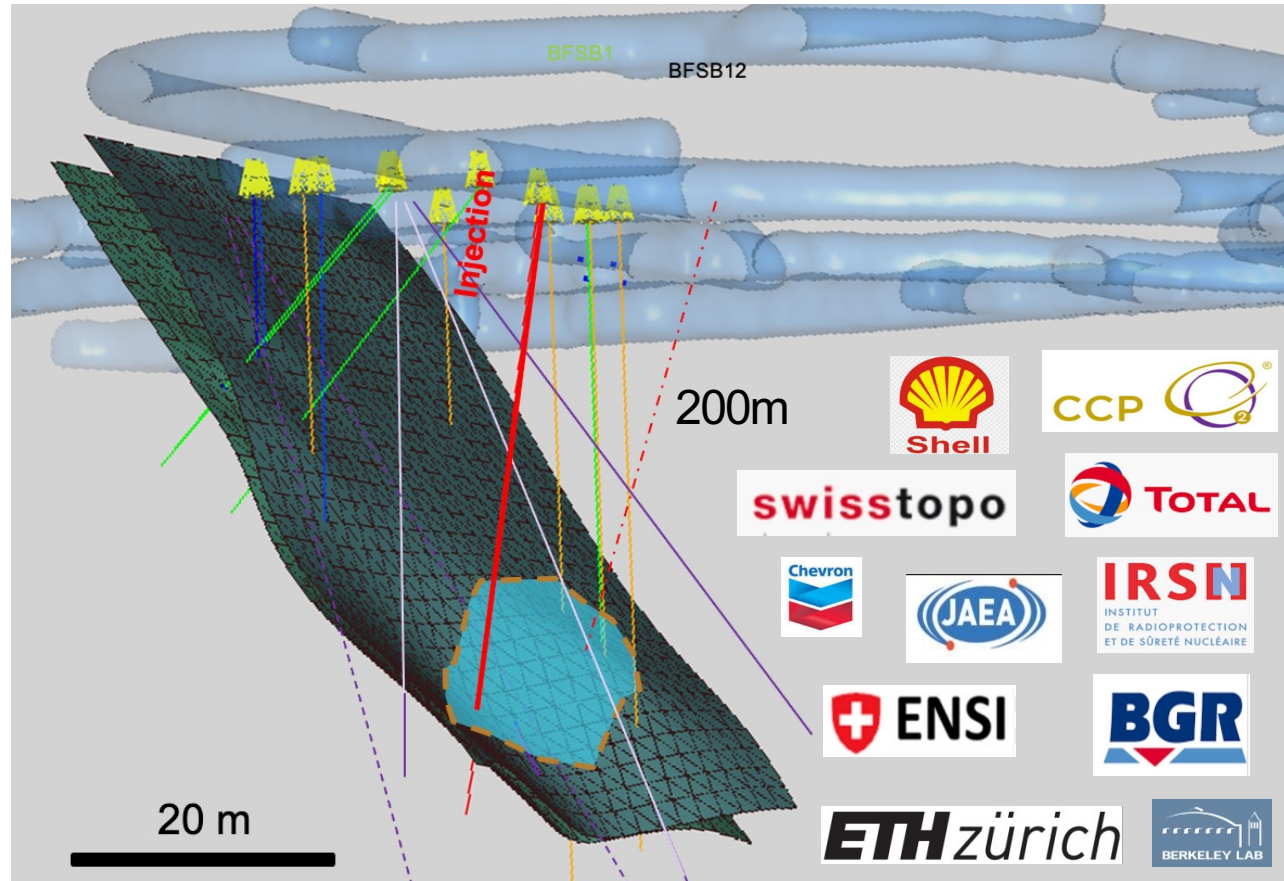

# Multi-Modal Monitoring

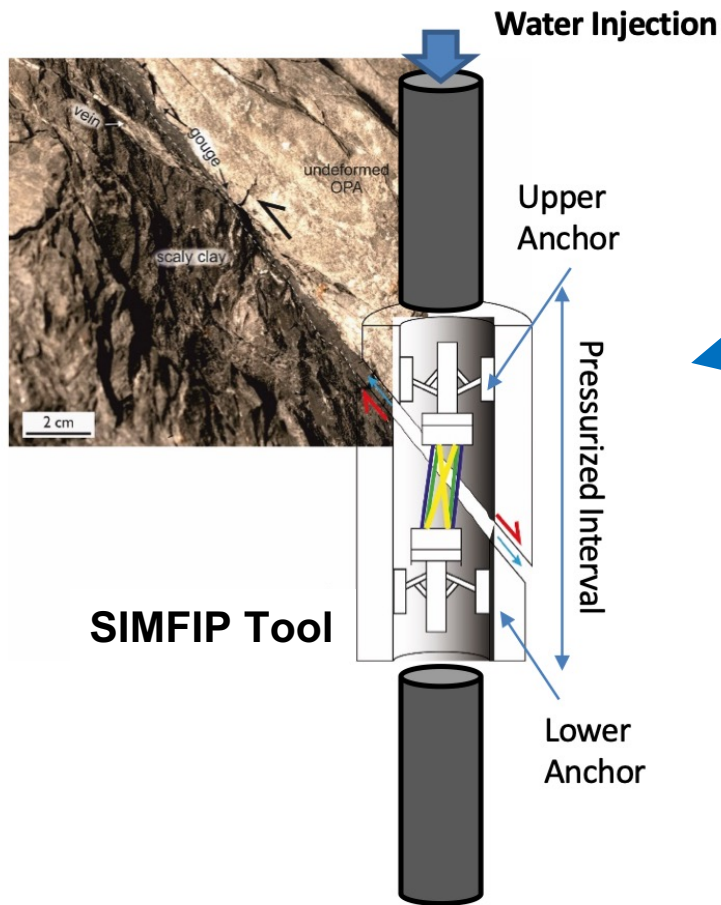

SIMFIP = Step-Rate Injection Method for Fracture In-Situ Properties

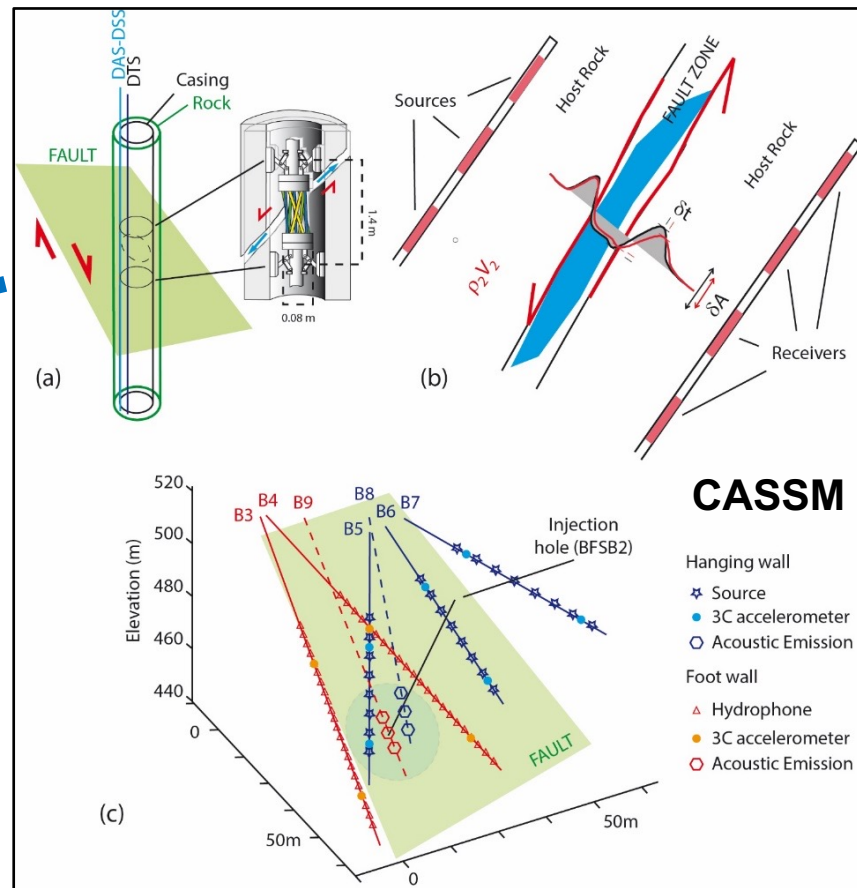

CASSM = Continuous Active Seismic Source Monitoring



# Impressions from Experimental Campaign

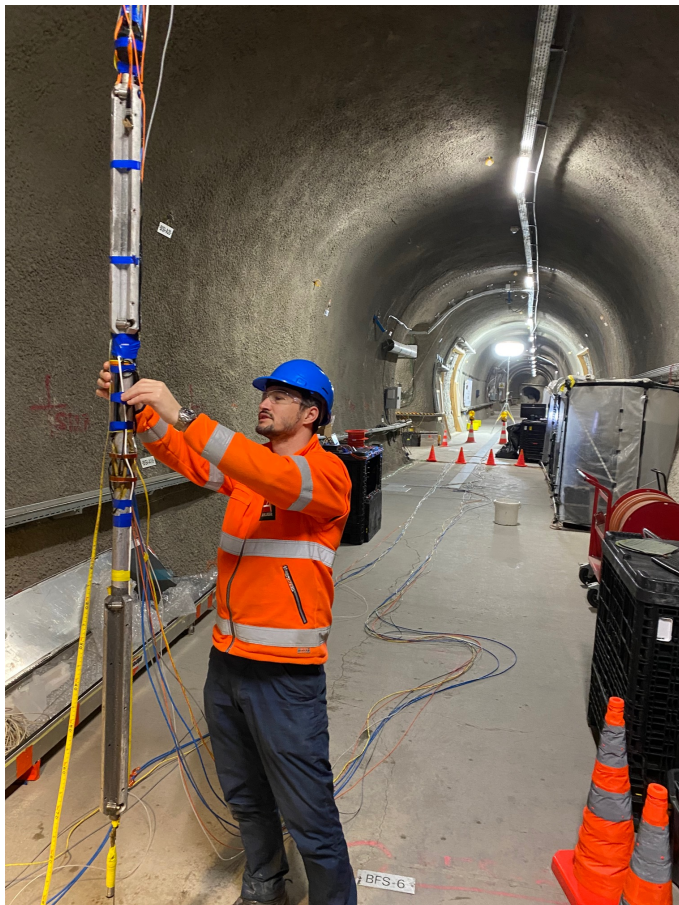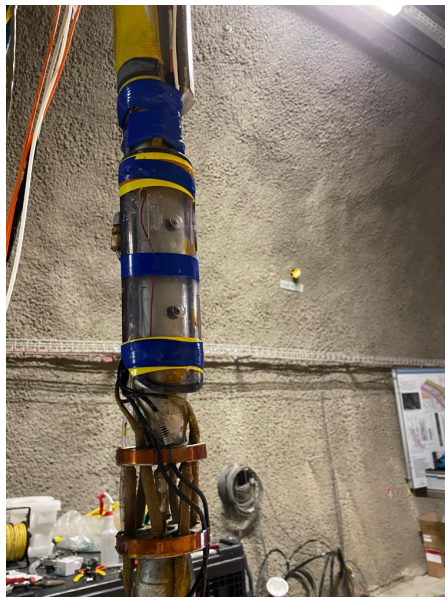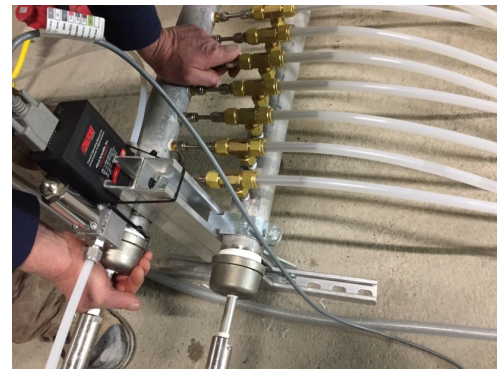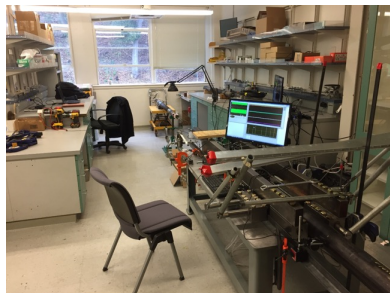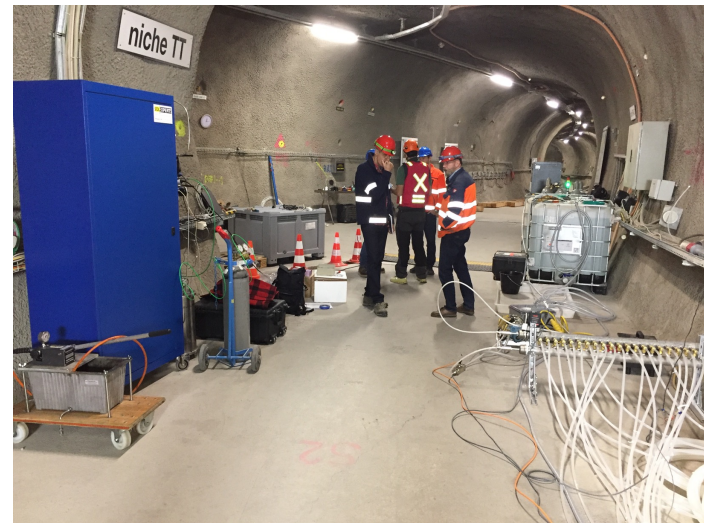

# Test Procedure: Cycled Short-Term Injections with Rest Periods

Mw ~ -2.5

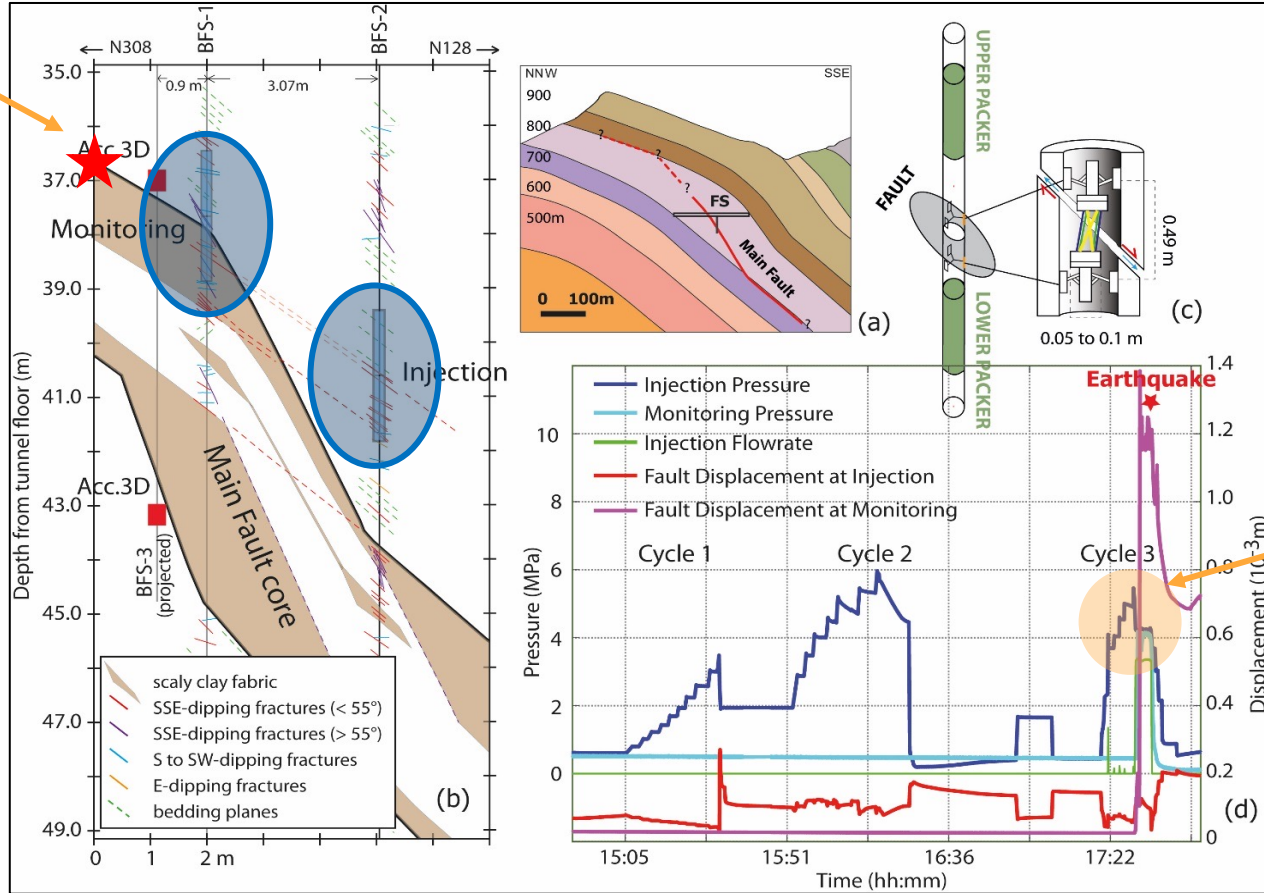

# Fault Reactivation Causes Strong Permeability Increase

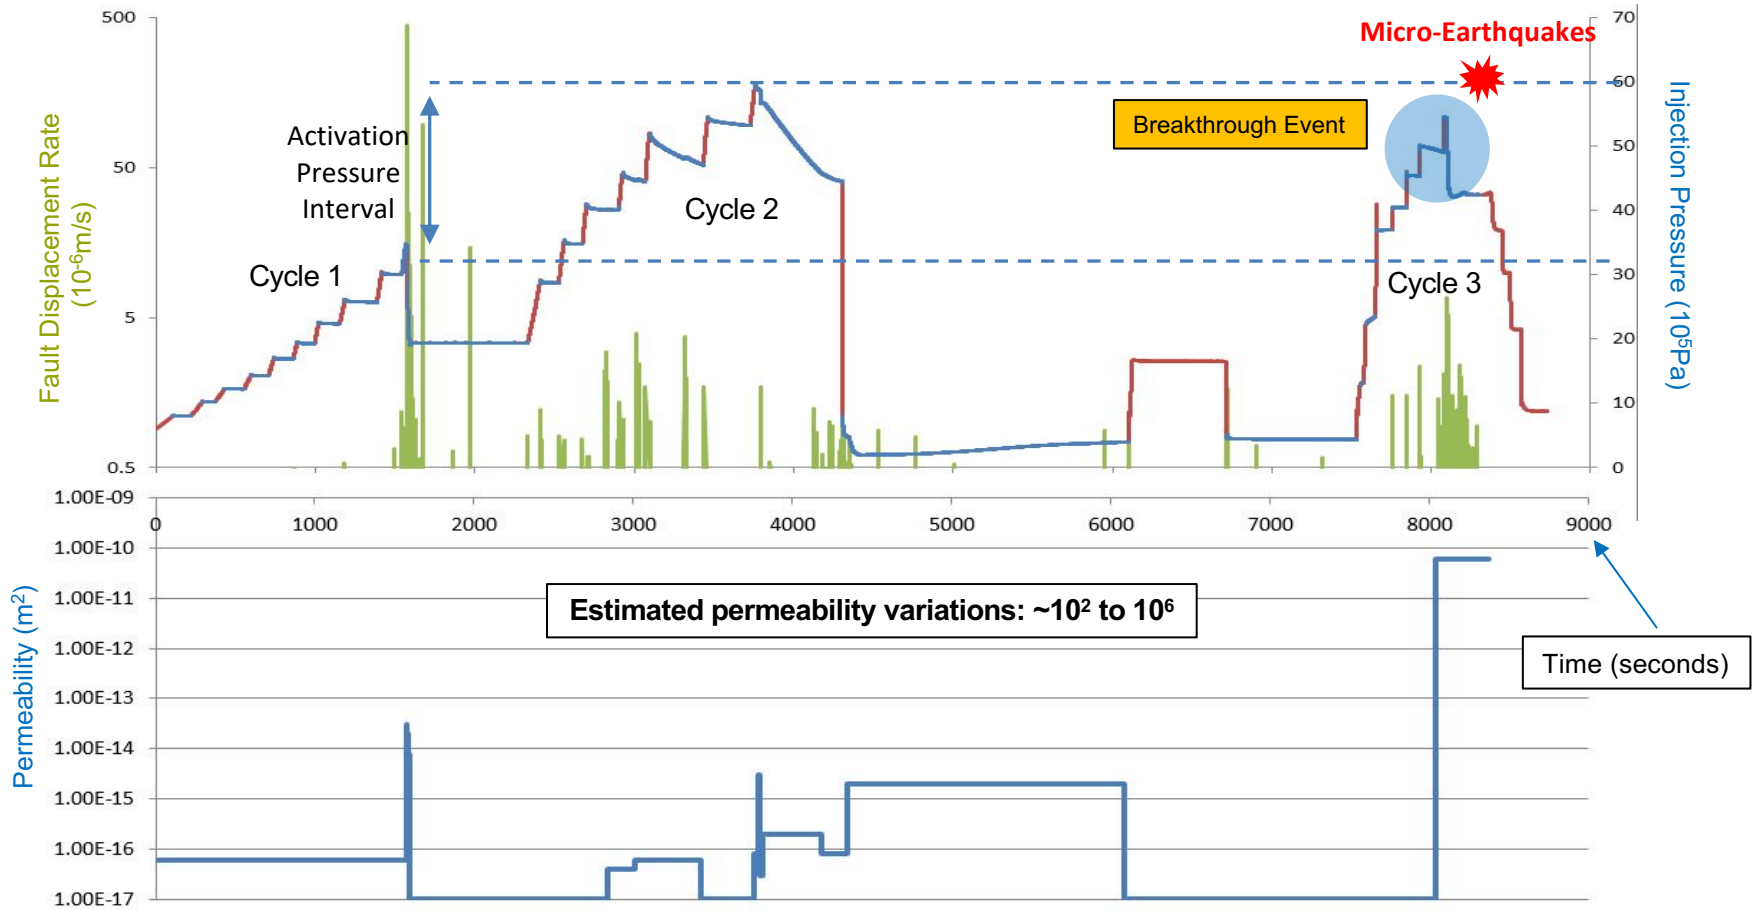

# Complex Coupling Between Displacement, Pressure, and Flow

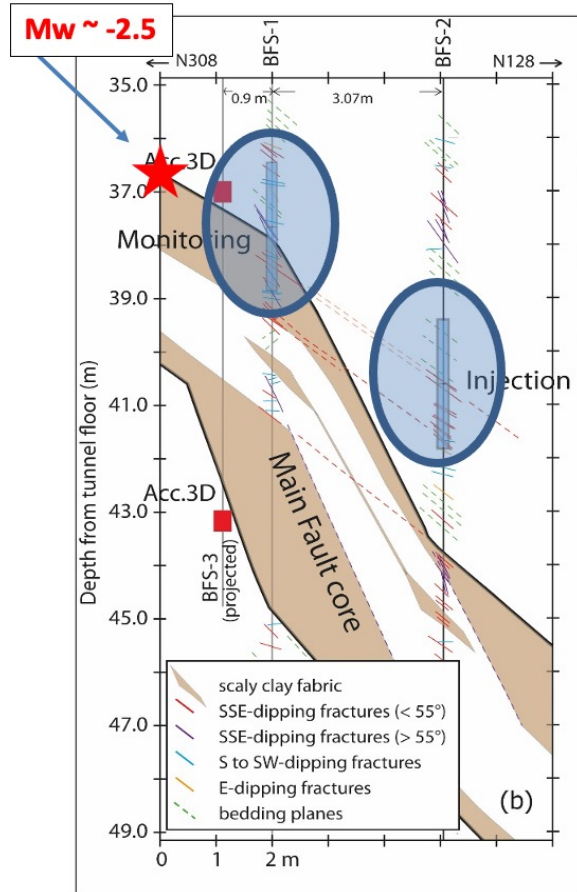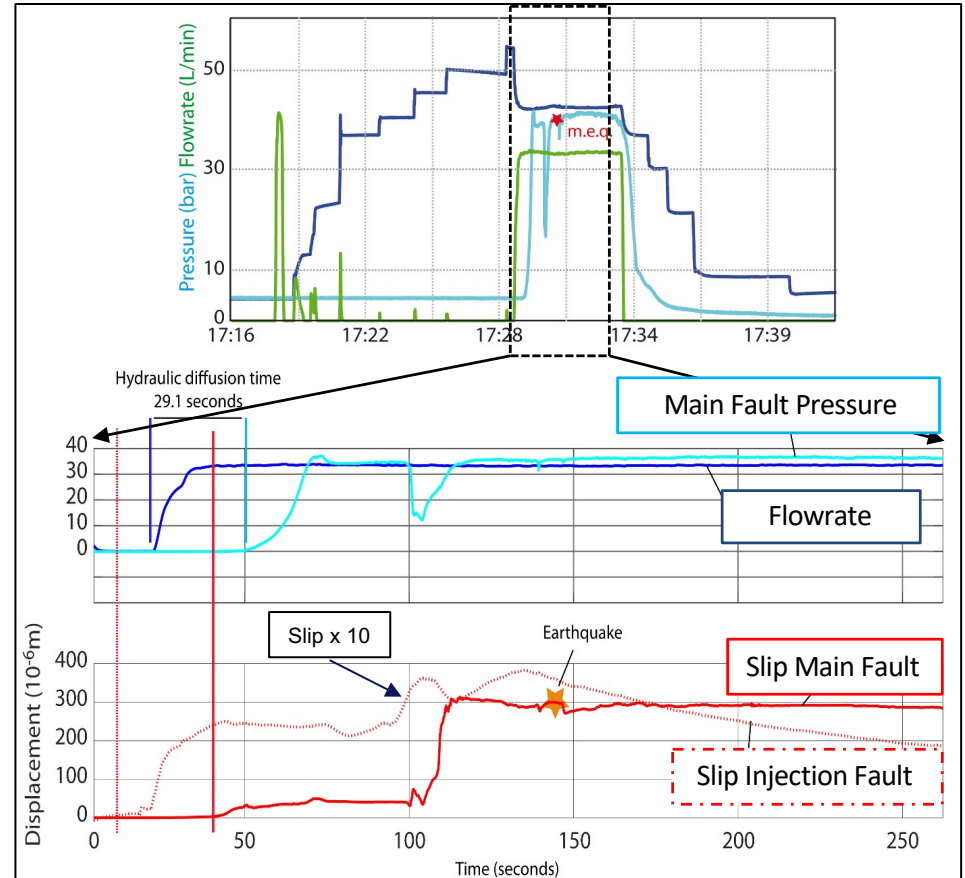

# From Point Measurements to Fault Patch Monitoring via CASSM

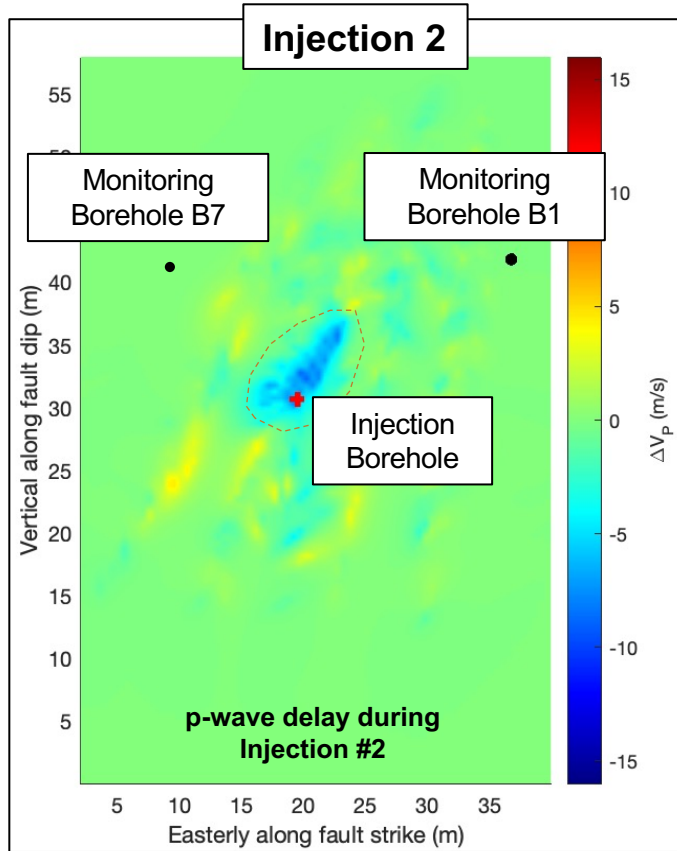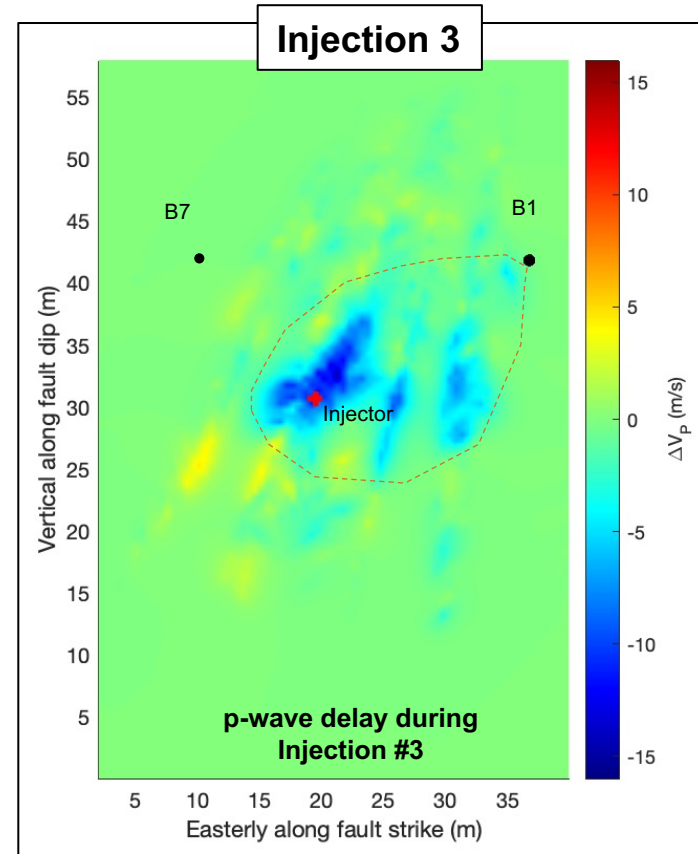

CASSM = Continuous Active Seismic Source Monitoring

# Shear Displacements Before and During Injection

p-wave delay during Injection #2

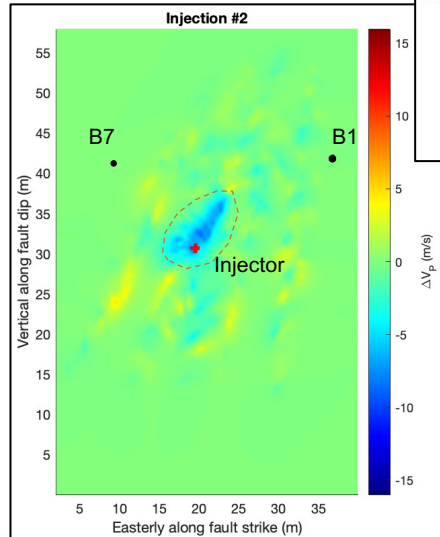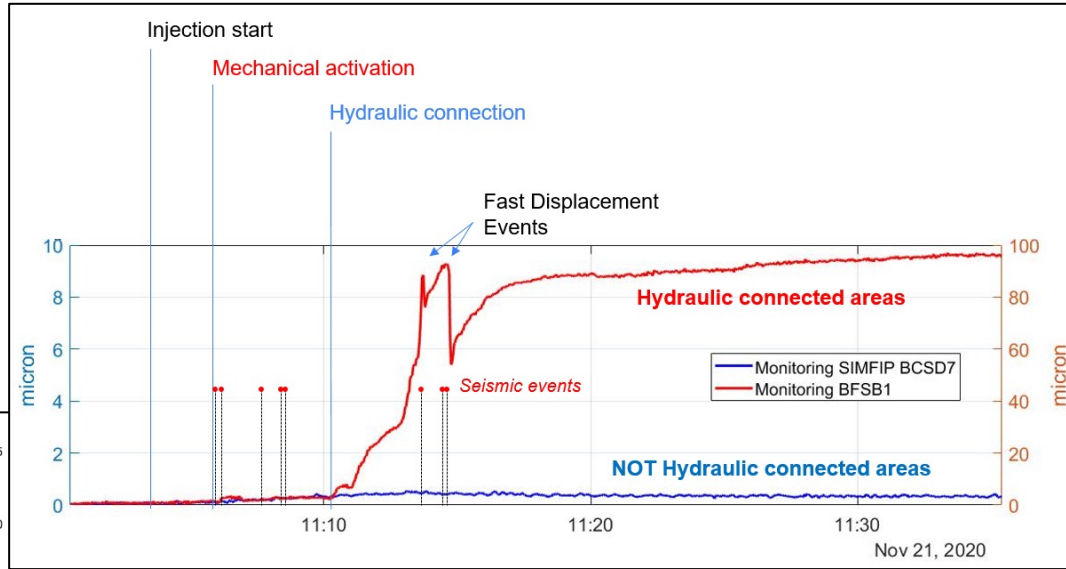

p-wave delay during Injection #3

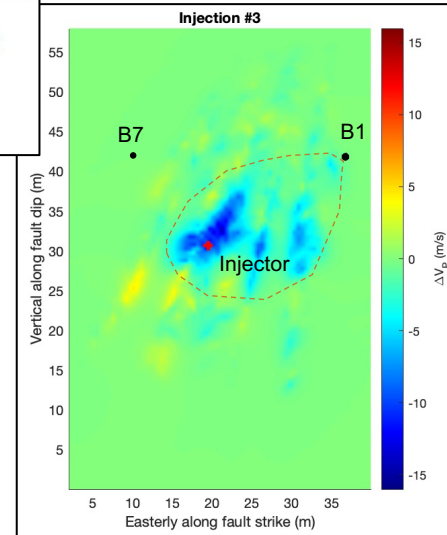

**CASSM Plus SIMFIP Confirm That Slip Front Precedes Fluid Propagation which in turn triggers further fault opening and flow in the fault**

# Long-Term Fault Behavior (Ongoing)

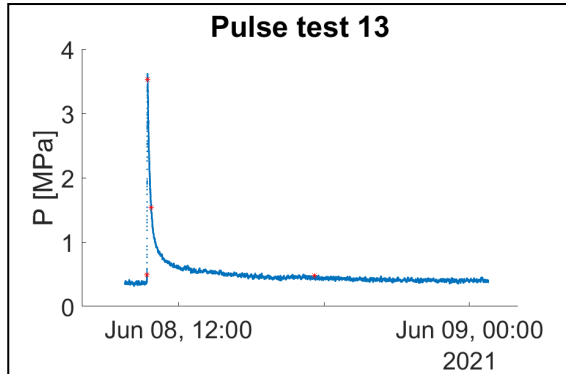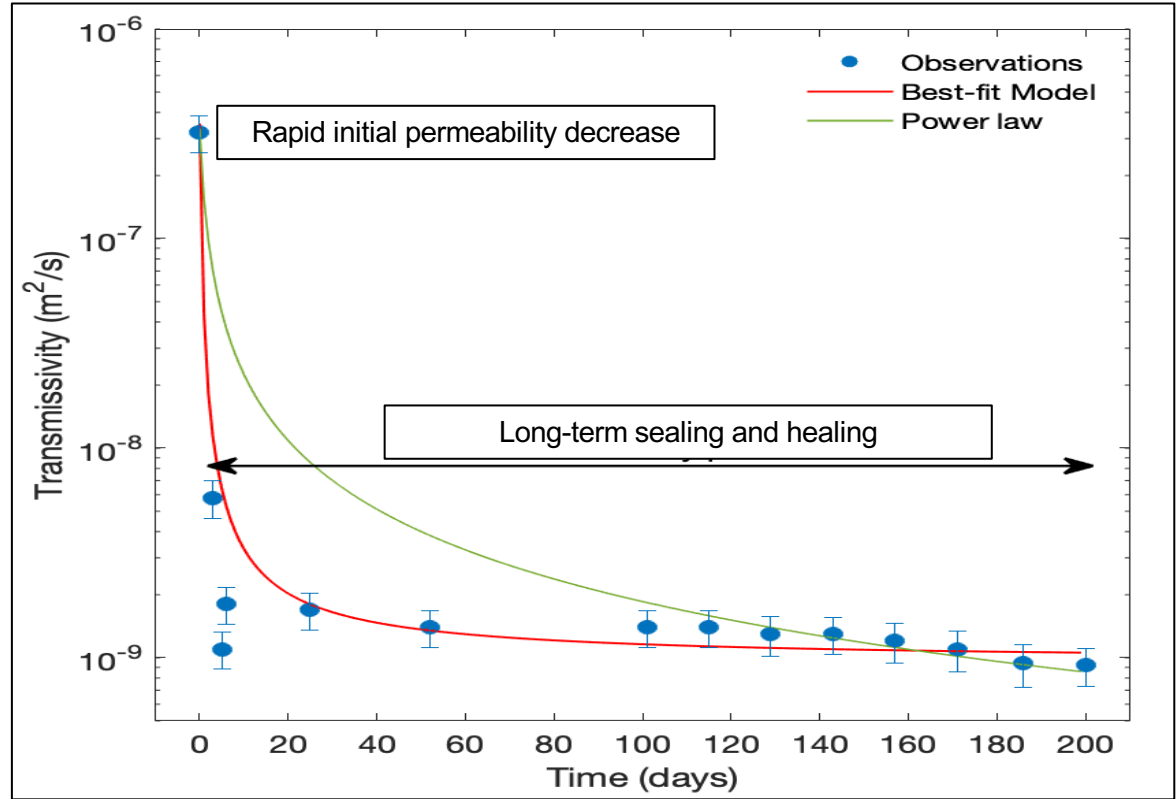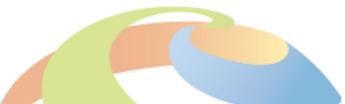

# Key Findings from Fault Reactivation Studies in Argillites

- Fault reactivation causes a large permeability increase in the fault zone:
  - Fluid migrates in the initially very low permeability fault only AFTER the fault fails locally.
  - Slip signal precedes fluid arrival and creates some permeability in the slip-dilatant rupture patch.
  - The patch opens further due to a large effective normal stress decrease.
  - This allows more fluid leakage to occur.
- Slip is largely aseismic thus hard to observe by micro-seismic monitoring
- As injection stops, we observe a rapid permeability drop followed by slow sealing and possibly healing of the fault

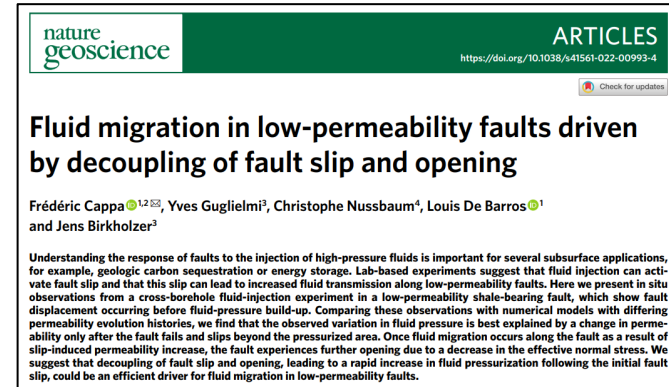

Cappa et al., 2022

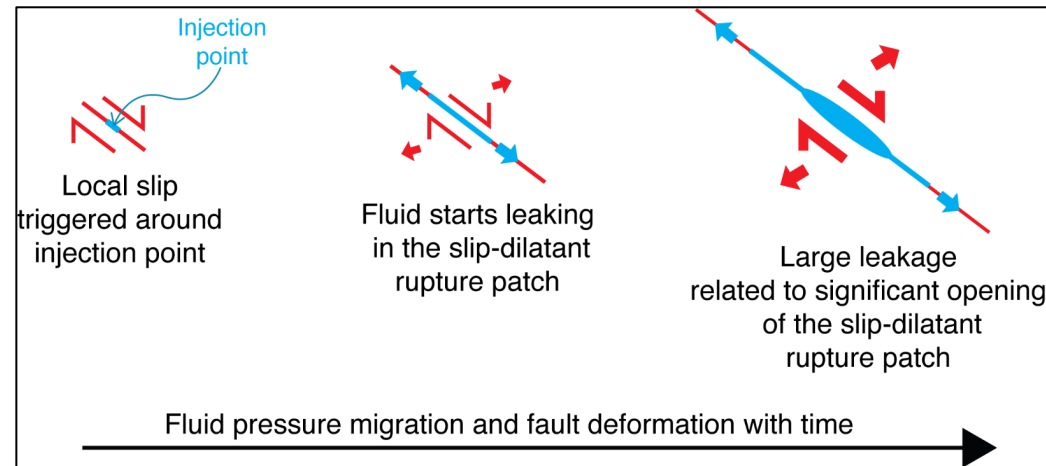



# Next Steps: Fault Behavior at Elevated Temperature (Starting Soon)

## Thermal Fault Slip Feasibility Experiment:

- Deploy a heat source into a single hole located outside the Main Fault in the same testbed
- Heat to about 80°C and passively monitor fault THM response using already deployed instruments
- Conduct fully coupled THM numerical modeling and use feasibility study results to design larger-scale dedicated THM experiment

## Objective:

- Effects of injecting non-isothermal fluids on fault reactivation and permeability evolution
- More realistic experimental conditions and driving forces

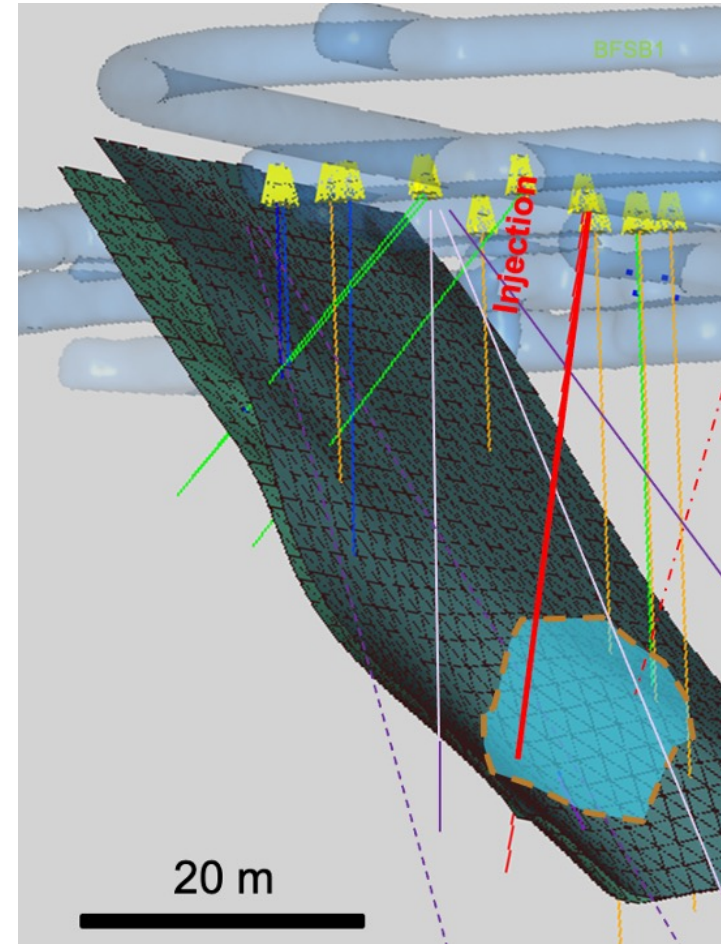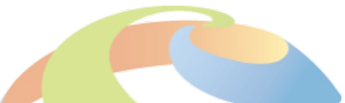

# A Testbed to Probe Effects of Distant Earthquakes on Barrier Integrity

A fault testbed nearby the major San Andreas Fault in California was established & instrumented in 2022. The site features 3-D displacement borehole sensors across the faults together with other long term monitoring tools.

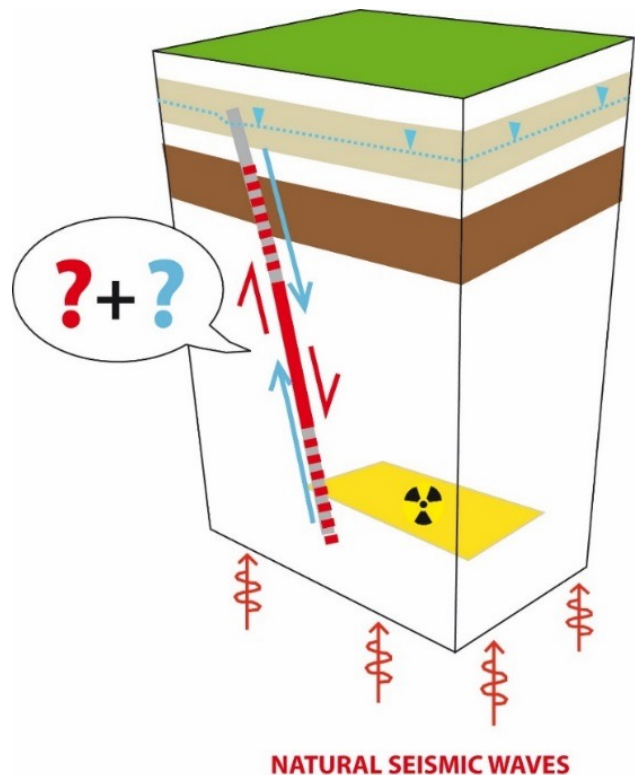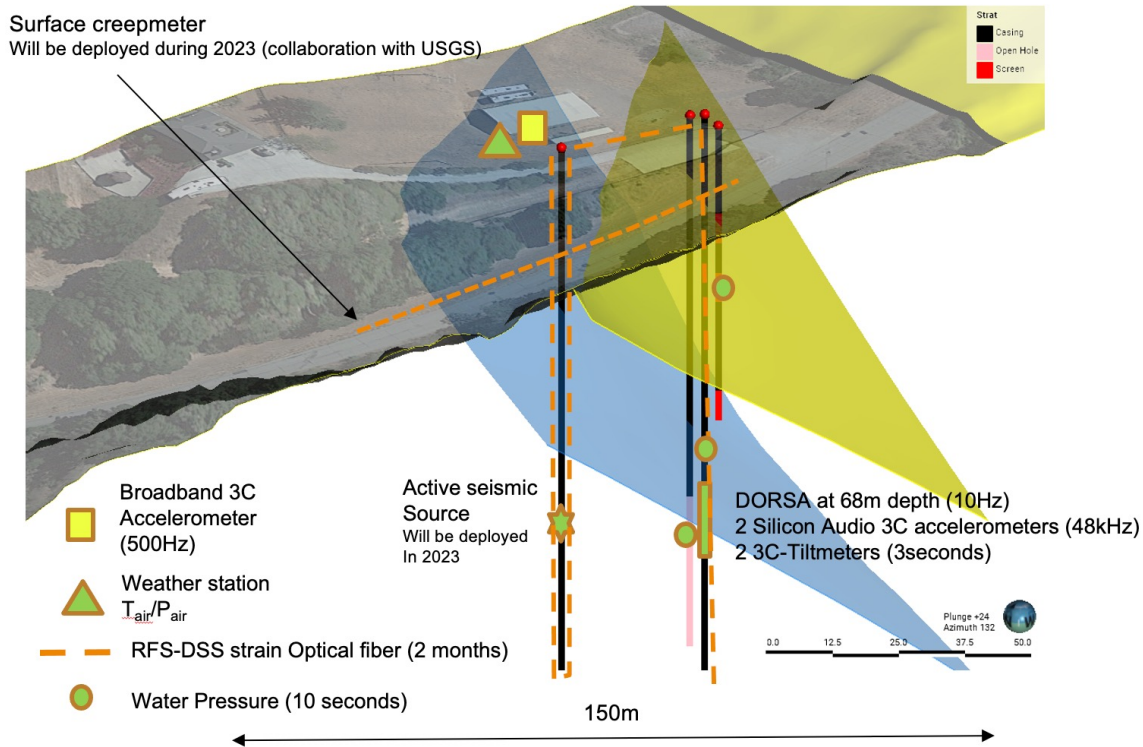

# Breaking News....Displacement Induced by Distant $M_w$ 4.4 Earthquake

In April 2023, a  $M_w$  4.4 earthquake occurred about 50 km away from the testbed site. The SIMFIP displacement sensor successfully recorded small fault displacements associated with this distant seismic event.

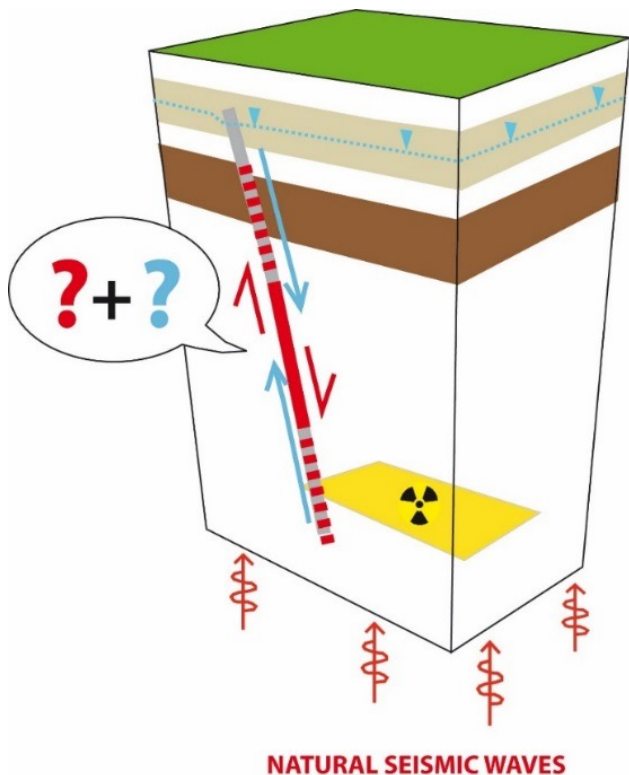

Seismic waves recorded  
on DORSA accelerometers

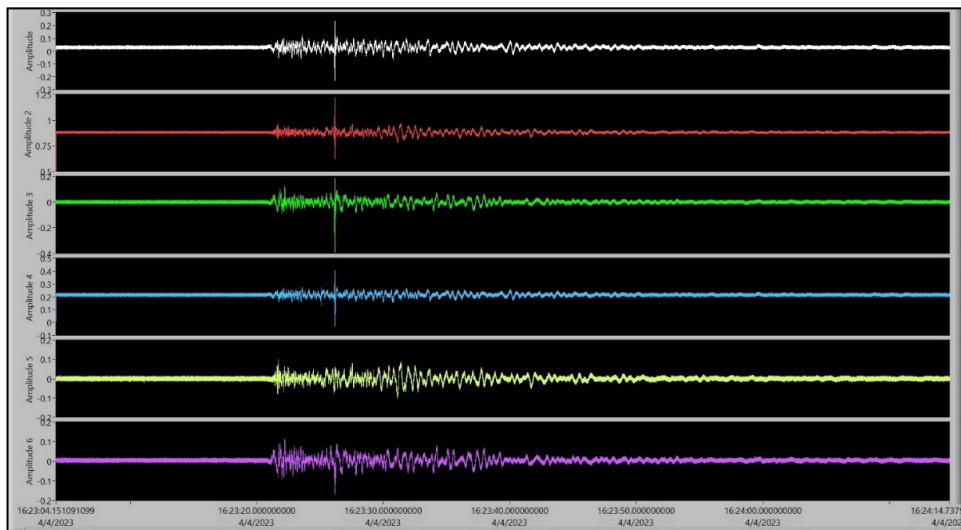

Fault 3D-Displacement  
[micrometers]

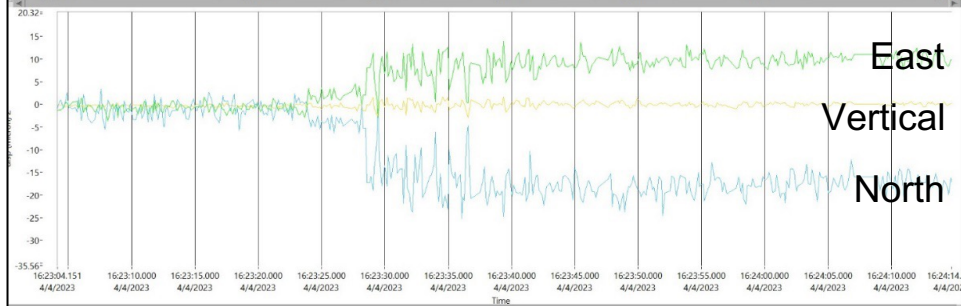

# Thank you

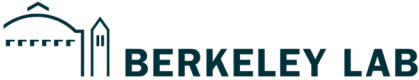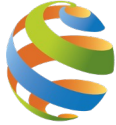

**EARTH &  
ENVIRONMENTAL  
SCIENCES**

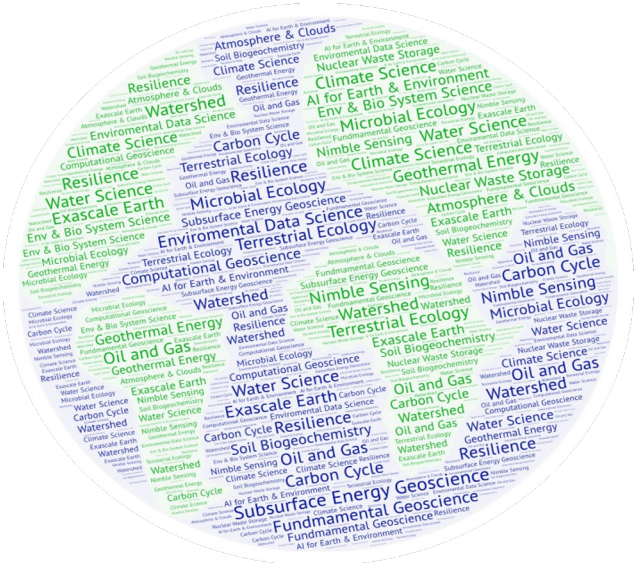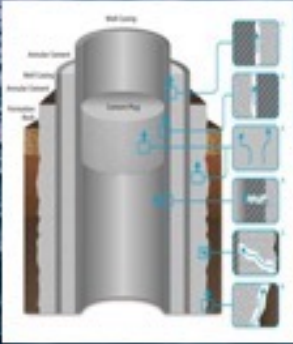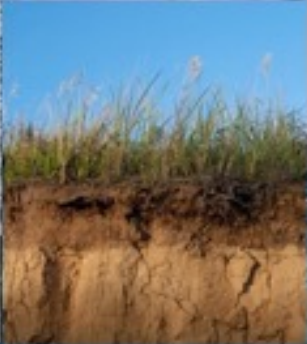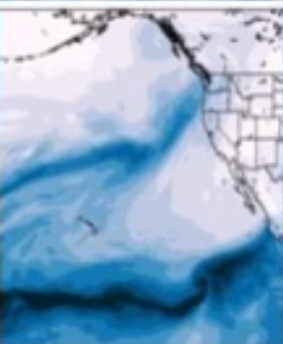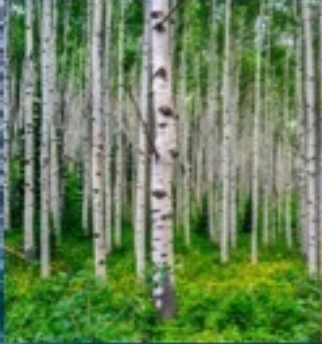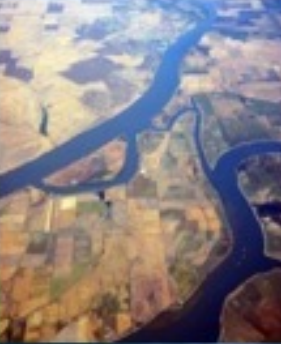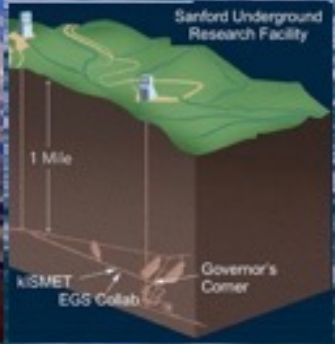

Supplement: Supplementary file 1 [file sand-2-61-2023-supplement.pdf]
